# Supplementary material for: Carbon Dioxide Pretreatment on Tomatoes Before Cold Storage Synergistically Delays Ripening Through Transcriptional Change of Ethylene-Related Genes and Respiration-Related Metabolisms
Source: Preprints.org preprint supplement (doi:10.20944/preprints202102.0090.v1), 2021-02-02
Supplement: Supplementary file 3 [file supplementary]

## Sheet: Table S1
Supplementary Table S1 Sequnces of primer used for qRT-PCR
Gene	ENTREZ	Accession	Primer sequences(5'-3')
	GENE ID		Forward	Reverse
ACTIN		AB199316	AAG GAT GCG TAT GTG GGT GA	TTA AGG GGT GCC TCA GTC AG
EF1		X14449	TTG TGA CCT TTG GCC CTA CT	ATG ATG ACC TGG GCA GTG AA
ERF4	543867	Ak322526	TC CGA TGA CAT CTC CCC TGT	AT GGC CTT CTC CTT ACC CCT
WRKY3	100736444	NM001247601	CA CAG GGG TGT TTG GCT ACA	CG ATG TGT AGT GGT GCA GGA
ACO3	101268031	AK328092	GGT TAG GTA AAA GGC ACA AA	GAA TAG GTG ACG AAA GTG GT
ACS4	778356	M83329	TGC TGC TAC CGT GTT CAA TTC	AGC AAA TGT TGT GTC TGA GTC
ERF107	101253257	Ak319935	ATC GTC GTC GTT GTA TCG GG	GAC GGA GTC ATC GTC CTT CC
EIL3	543680	AF328786	ATG AGC ACA ACA CAG TTT TT	ATA TCC TGC TTT GTC AGC TG
ERF1	606712	AY044236	CCT CAA ACG CTA GTA CTA CA	TCC ATT ACG CGT TGA ATC CC
ERF2	543866	AY192368	CTA AGA TGT GTG GTG GTG CA	AAC AGG TTC AAC GTT CTC GA

## Sheet: Supple Fig 1. 
	Supplementary Fig 1.
	Supplemetal Figure 1. Venn diagram showing differentially expressed genes in CO2 treated verse non treated tomato at each time point.
	Day 0 means CO2 treatment for 3hr before storage. Day 7and 14 means 7days or 14days of cold storage 4 °C after CO2 treatment and Day14+8 means 8days at shelf life condtion at 20°C after cold stoage.

## Sheet: Supple Fig 2. 
	Supplemetal Figure 2. Heat map showing the expression levels of DEGs in all samples. Heat map of one-way hierarchical clustering (4391 genes satisfying log2 FC ≥2) using the Z-score for the normalized value (log2). Samples were obtained from non-treated (control) and CO2-treated tomatoes after 0, 7, and 14 d at 4°C following CO2 treatment and after 14 d at 4°C, followed by 8 d at 20°C (14 + 8 d).

## Sheet: Supple Fig3
	Supplemetal Figure 4. Expression profiling of the DEGs involved in ethylene signaling and synthesis. Expression profiling was performed with the PermutMatrix software using the Z-score for normalized values from tomatoes treated or non-treated with CO2 after 0, 7, and 14 d at 4°C following CO2 treatment and after 14 d at 4°C, followed by 8 d at 20°C (14 + 8 d). Red and green colors represent high…
